# Supplementary material
Source: PubMed Central journal article supplement (PMC6372355)
Supplement: NIHMS1002765-supplement-supplemental.pdf [file NIHMS1002765-supplement-supplemental.pdf]

## Supporting Information

### Investigating the Stuffed Methyltransferase Domain of PchF in Pyochelin Biosynthesis

Trey A. Ronnebaum,<sup>1</sup> Jeffrey S. McFarlane,<sup>2</sup> Thomas E. Prisinzano,<sup>3</sup> Squire J. Booker,<sup>4</sup>  
Audrey L. Lamb<sup>1,2</sup>

<sup>1</sup>Department of Chemistry, <sup>2</sup>Department Molecular Biosciences, <sup>3</sup>Department of Medicinal Chemistry, The University of Kansas, Lawrence, Kansas 66045, United States. <sup>4</sup>Department of Chemistry, Department of Biochemistry and Molecular Biology, and the Howard Hughes Medical Institute, The Pennsylvania State University, University Park, Pennsylvania, 16802.

Corresponding Author: Audrey L. Lamb, email: [lamb@ku.edu](mailto:lamb@ku.edu), phone: (785) 864-5075

| <b>Table of Contents</b>                                                                                               | <b>Page #</b> |
|------------------------------------------------------------------------------------------------------------------------|---------------|
| Figure S1: Possible biosynthetic strategies for PchF                                                                   | S2            |
| Figure S2: Separation of HPT <sub>ox</sub> T <sub>red</sub> -CO <sub>2</sub> Et diastereomers on CHIRALCEL OD-H column | S3            |
| Figure S3: Adenylation assays                                                                                          | S4            |
| Figure S4: Methylated Product Formation Assays                                                                         | S5            |
| Figure S5: HPT <sub>ox</sub> T <sub>red-M</sub> -CO <sub>2</sub> Et standard curve.                                    | S6            |
| Figure S6: S-adenosylmethionine Formation Assay UPLC traces                                                            | S7            |
| References                                                                                                             | S8            |

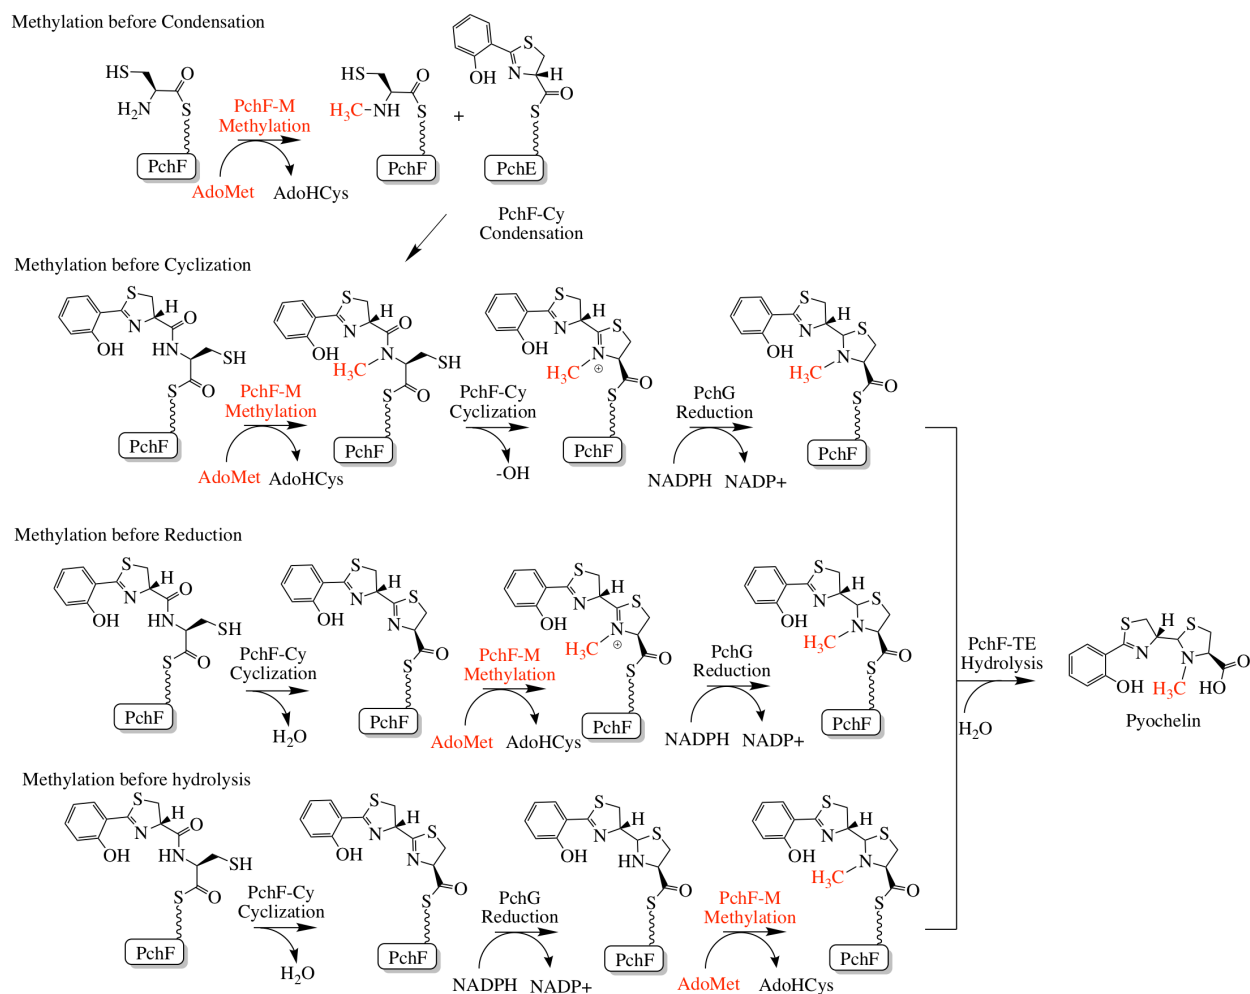

**Figure S1: Possible biosynthetic strategies for PchF.** AdoMet dependent methylation is proposed to take place as the last tailoring step before hydrolysis and the release of the mature peptide; however previous evidence is contradictory. Four potential biosynthetic pathways are shown for methyl transfer: before condensation, before cyclization, before reduction, or directly before hydrolysis. The methyltransferase chemistry is highlighted in red.

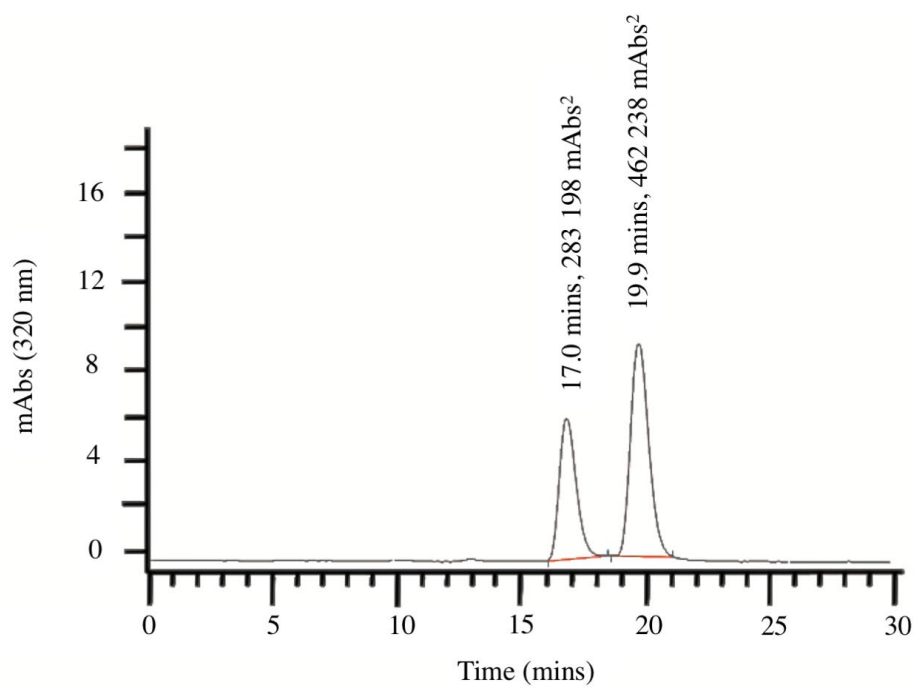

**Figure S2: Separation of HPT<sub>ox</sub>T<sub>red</sub>-CO<sub>2</sub>Et diastereomers on CHIRALCEL OD-H column.** Separation conditions: 1 mL/min, Hexane:Isopropanol (90:10), absorbance monitored at 320 nm. HPT<sub>ox</sub>T<sub>red</sub>-CO<sub>2</sub>Et exists as a diastereomer (38:62) eluting at 17.0 mins and 19.9 mins.

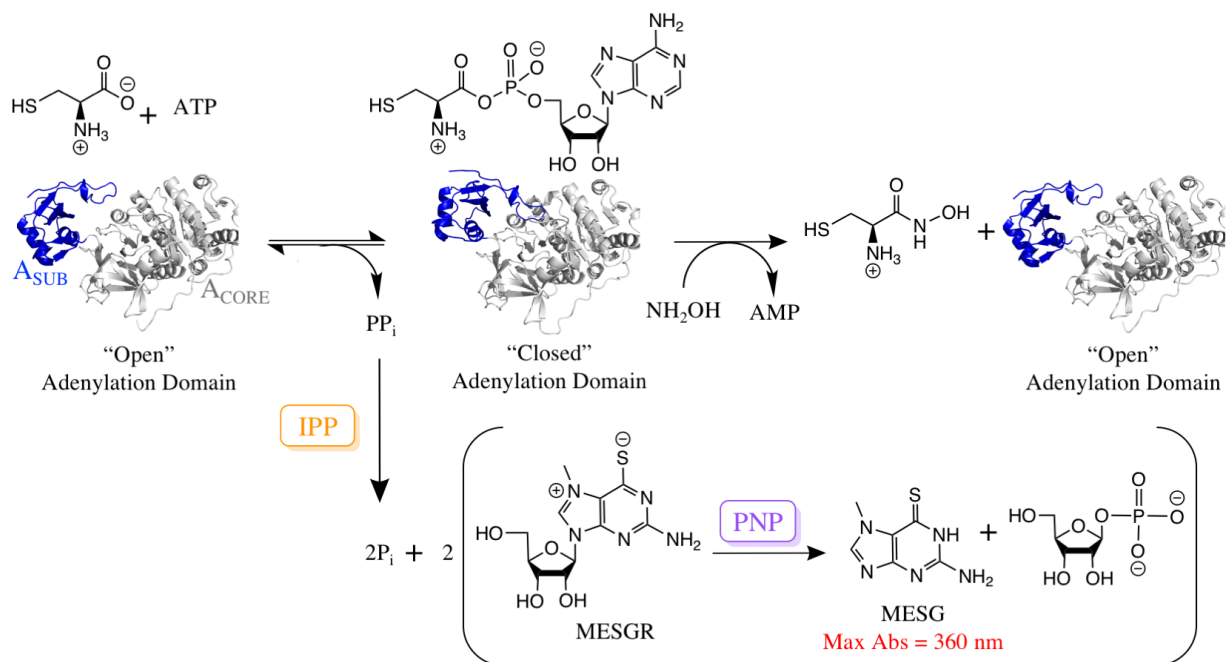

**Figure S3: Adenylation assay** (based on the assay designed by the Aldrich laboratory<sup>1, 2</sup>). The adenylation domain of PchF is specific for L-cysteine, forming an aminoacyl-AMP bond and releasing pyrophosphate (PP<sub>i</sub>). The native protein is post-translationally modified with coenzyme A, generating a 4' phosphopantetheinyl (Ppant) on a conserved serine in the thiolation (T) domain. The high energy aminoacyl-adenylate bond is used to link the cysteine substrate to the Ppant arm of the T-domain. In this assay, the recombinant PchF variants are not post-translationally modified with the Ppant stalling the enzyme after the formation of the aminoacyl-AMP intermediate, with the adenylation domain trapped in the "closed" conformation. Opening of the active site and release of pyrophosphate (PP<sub>i</sub>) can be promoted by addition of the nucleophile surrogate hydroxylamine, allowing the adenylation activity to enter the steady state. Inorganic pyrophosphatase (IPP) converts one pyrophosphate (PP<sub>i</sub>) molecule to two inorganic phosphate (P<sub>i</sub>) molecules. Purine nucleoside phosphorylase (PNP) catalyzes the phosphorylation of 7-methylthioguanosine (MesGR), generating ribose 1-phosphate and the chromogenic 7-methylthioguanine (MesG), which is monitored at 360 nm (bottom). Two molecules of MesG are generated for every one aminoacyl-AMP formation. Structures of LgrA<sup>3</sup> from gramicidin biosynthesis are used to illustrate the open (PDB: 5ES5) and closed (PDB: 5E55) A-domains. The A<sub>core</sub> subdomain is gray and the smaller C-terminal A<sub>sub</sub> is blue.

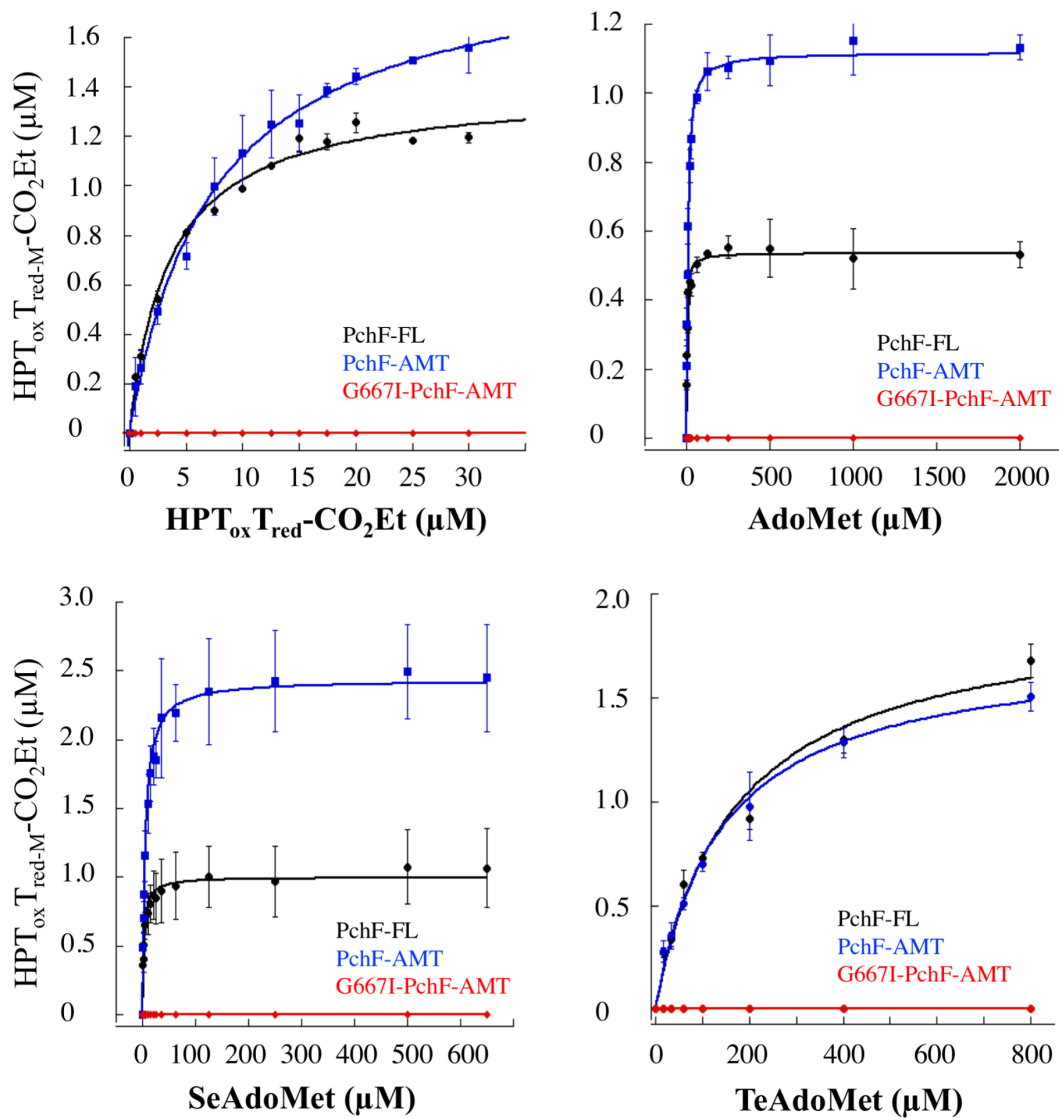

**Figure S4: Methylated Product Formation Assays.** Methyltransferase assay of PchF-FL, PchF-AMT, and G667I-PchF-AMT. Michaelis-Menten steady-state kinetic plots of (A) HPT<sub>ox</sub>T<sub>red</sub>-CO<sub>2</sub>Et, (B) AdoMet, (C) SeAdoMet, (D) TeAdoMet.

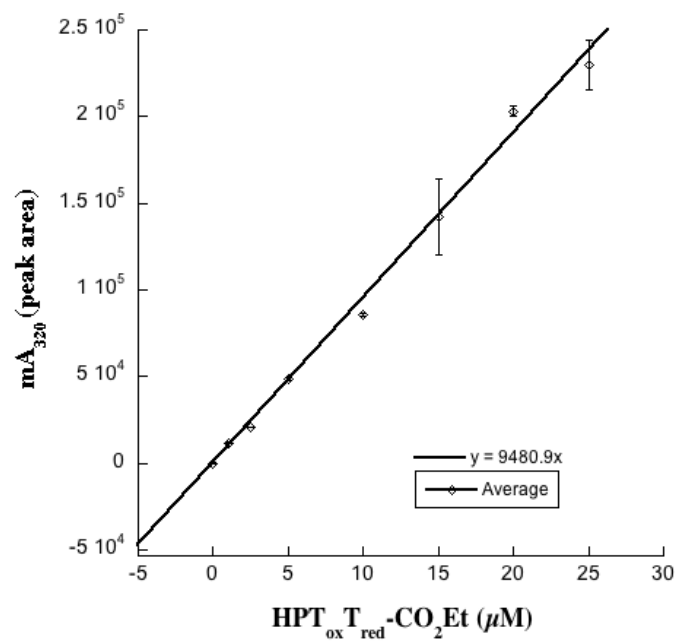

**Figure S5: HPT<sub>ox</sub>T<sub>red</sub>-M-CO<sub>2</sub>Et standard curve.** HPT<sub>ox</sub>T<sub>red</sub>-M-CO<sub>2</sub>Et standard curve was produced by running methyltransferase assays to completion at concentrations varying from 0-25 μM HPT<sub>ox</sub>T<sub>red</sub>-CO<sub>2</sub>Et. Reactions were performed in triplicate. The slope, 9480 mAU/μM, was used to convert mAU to concentration of HPT<sub>ox</sub>T<sub>red</sub>-M-CO<sub>2</sub>Et.

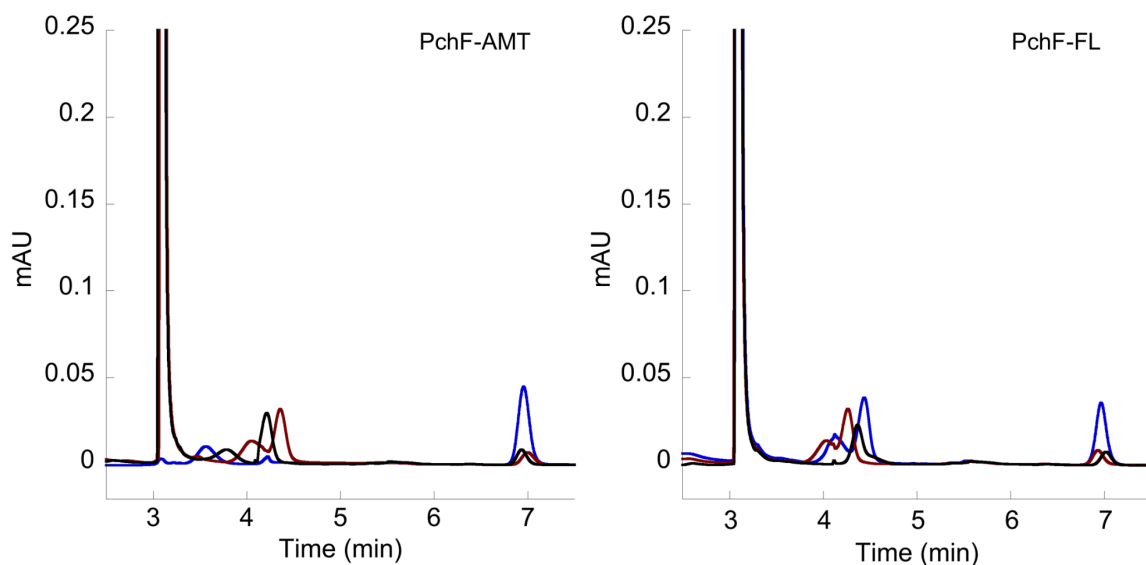

**Figure S6: S-adenosylmethionine Formation Assay UPLC traces.** UPLC traces of AdoHCys formation (7.0 mins) for PchF-AMT and PchF-FL reactions with no substrate (black), 3 mM L-Cys-OEt (red), and 30 μM HPT<sub>ox</sub>T<sub>red</sub>-CO<sub>2</sub>Et (blue).

- [1] Duckworth, B. P., Wilson, D. J., and Aldrich, C. C. (2016) Measurement of Nonribosomal Peptide Synthetase Adenylation Domain Activity Using a Continuous Hydroxylamine Release Assay, *Methods Mol Biol* 1401, 53-61.
- [2] Wilson, D. J., and Aldrich, C. C. (2010) A continuous kinetic assay for adenylation enzyme activity and inhibition, *Anal Biochem* 404, 56-63.
- [3] Reimer, J. M., Aloise, M. N., Harrison, P. M., and Schmeing, T. M. (2016) Synthetic cycle of the initiation module of a formylating nonribosomal peptide synthetase, *Nature* 529, 239-242.
